# Supplementary material
Source: Research Square preprint supplement (doi:10.21203/rs.3.rs-10074708/v1)
Supplement: Supplementary file 1 [file 8b4e13f582017821c125e500.docx]

**In doped NiCo-LDH as bifunctional electrocatalysts for overall water splitting**

Zicheng Huang**1 ·** Mengwei Yu**1 ·** Yulun Xie**1, * ·** Yuedong Guo**1**

1School of Mechanical Engineering, Anhui Institute of Information Technology, Wuhu 241100, Anhui, People’s Republic of China

* Corresponding author: [2015063@aiit.edu.cn](mailto:2015063@aiit.edu.cn)


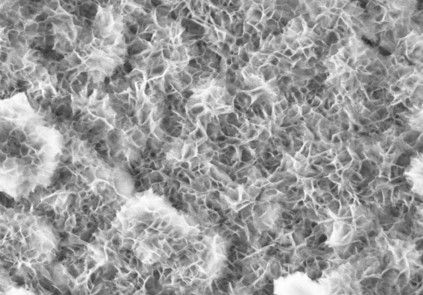


Figure S1 SEM images of NiCo LDH


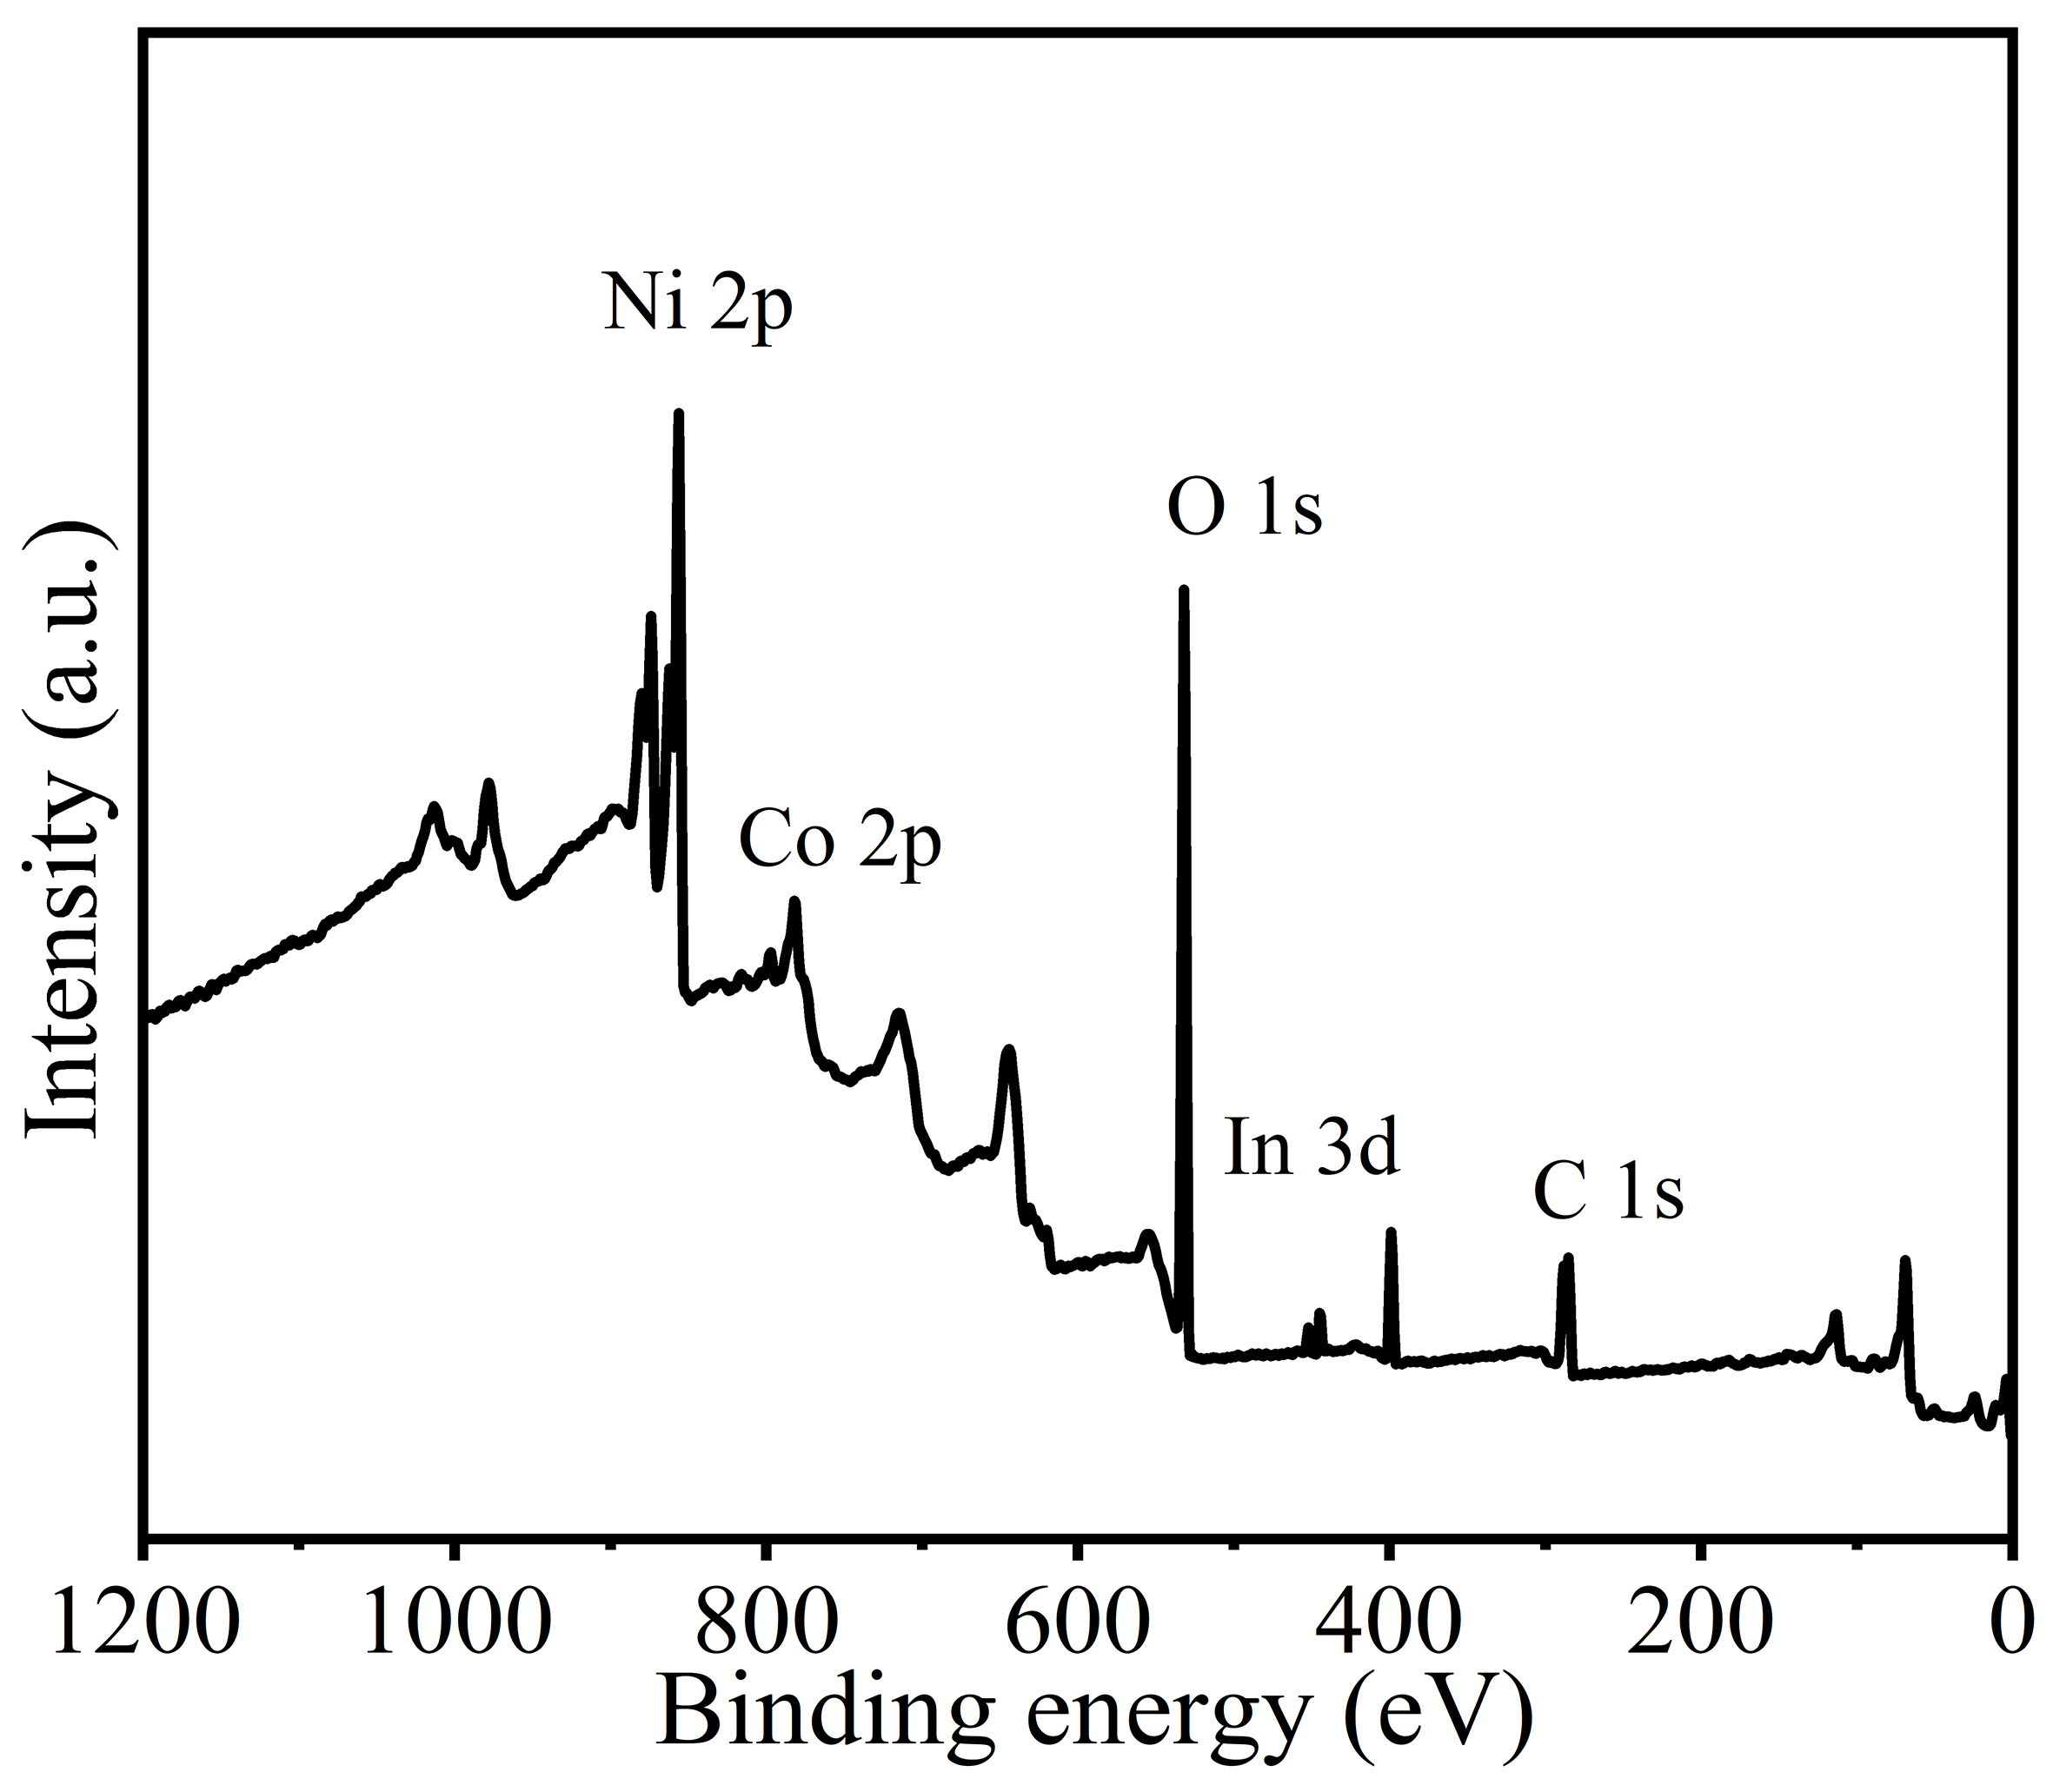


Figure S2 XPS survey spectra of In1.0-NiCo LDH
